# Supplementary material
Source: Springer Nature journal article supplement (https://www.springermedizin.de/resource/supplementary/12884_2011_486_MOESM1_ESM.pdf/9457906)
Supplement: MOESM1 [file 9457906]

**Core Experience:  
Getting more than they realized they needed**

Getting more in one  
place at one time

Learning and gaining  
meaningful information

Actively participating and  
taking on ownership of care

Not feeling  
alone in the  
experience

Feeling  
supported

Connecting
